# Supplementary material for: Choline-like ionic liquid-based aqueous two-phase extraction of selected proteins
Source: Royal Society of Chemistry journal article supplement (doi:10.1039/c3ay40377g), 2013-01-01
Supplement: c3ay40377g.pdf [file c3ay40377g.pdf]

## Supporting Information

### Characterization of the synthesized products

1-Chlorobutane (AR, 9.3g, 0.1mol) and N-methylimidazole (AR, 8.2g, 0.1mol) were mixed into round-bottom flask at 80°C for 24 h. The precipitate was washed with ethyl acetate and dried under reduced pressure at 70°C. Light yellow liquid was formed and the yield is 91.32%.

1-Bromobutane (AR, 13.7g, 0.1mol) and N-methylimidazole (AR, 8.2g, 0.1mol) were mixed into round-bottom flask at 80°C for 24 h. The precipitate was washed with ethyl acetate and dried under reduced pressure at 70°C. Light yellow liquid is formed and the yield is 90.06%.

3-Chloro-1-propanol (AR, 9.45g, 0.1mol) and N-methylimidazole (AR, 8.2g, 0.1mol) were mixed into three-necked bottle with N<sub>2</sub> at 80°C for 24h. The precipitate was washed with ethyl acetate and dried under reduced pressure at 70°C. Light yellow liquid is formed and the yield is 72.13%.

3-Chloro-1-propanol (AR, 9.5g, 0.1mol) and N, N-dimethyl ethanolamine (AR, 8.9g, 0.1mol) were mixed into three-necked bottle with N<sub>2</sub> at 80°C for 24h. The precipitate was washed with ethyl acetate and dried under reduced pressure at 70°C. White solid is formed and the yield is 76.27%.

**Table S1** The chemical shifts of  $^1\text{H}$  NMR spectra for ionic liquids

| Ionic liquids <sup>a</sup> | $^1\text{H}$ NMR spectra ( $\delta$ , $\times 10^{-6}$ ) <sup>b</sup> |             |                                    |                                    |             |                                    |                                  |                                    |                                    |                      |
|----------------------------|-----------------------------------------------------------------------|-------------|------------------------------------|------------------------------------|-------------|------------------------------------|----------------------------------|------------------------------------|------------------------------------|----------------------|
|                            | 2-H                                                                   | 3-H         | 4-H                                | 5-H                                | 6-H         | 7-H                                | 8-H                              | 9-H                                | 10-H                               |                      |
| [bmim][Cl]                 | 10.31(s, 1H)                                                          | –           | 7.50(d, $J=2.0$<br><i>Hz</i> , 1H) | 7.60(d, $J=2.0$<br><i>Hz</i> , 1H) | 4.11(s, 3H) | 4.34(t, $J=7.2$<br><i>Hz</i> , 2H) | 1.89(m, 2H)                      | 1.3(q, $J=7.6$<br><i>Hz</i> , 2H)  | 0.95(t, $J=7.2$<br><i>Hz</i> , 3H) |                      |
| [bmim][Br]                 | 9.87(s, 1H)                                                           | –           | 7.40(d, $J=2.0$<br><i>Hz</i> , 1H) | 7.52(d, $J=2.0$<br><i>Hz</i> , 1H) | 3.91(s, 3H) | 4.14(t, $J=7.2$<br><i>Hz</i> , 2H) | 1.68(m, 2H)                      | 1.15(q, $J=7.6$<br><i>Hz</i> , 2H) | 0.73(t, $J=7.2$<br><i>Hz</i> , 3H) |                      |
| [OH-pmim][Cl]              | 9.41(s, 1H)                                                           | –           | 7.87(s, 1H)                        | 7.78(s, 1H)                        | 5.04(s, 1H) | 4.27(t, $J=7.0$<br><i>Hz</i> , 2H) | 3.54(m, 2H)                      | 1.94(p, $J=6.5$<br><i>Hz</i> , 2H) | –                                  |                      |
| Choline-like IL            | 5.61(s, 1H)                                                           | 4.97(s, 1H) | 3.80(s, 2H)                        | 3.47(m, 6H)                        | 3.09(s, 6H) | 4.31(t, $J=7.4$<br><i>Hz</i> , 2H) | 1.83 (t $J =$<br><i>Hz</i> , 2H) | –                                  | –                                  | 11.7 <i>Hz</i> , 2H) |

<sup>a</sup> IL1 and IL2 were dissolved in  $\text{CDCl}_3$ . IL3 and IL4 were dissolved in DMSO. The results were recorded on Varian-INOVA 400 NMR spectrometry.

<sup>b</sup> <sup>1</sup>H NMR chemical shifts were recorded at 400MHz and reported downfield from trimethylsilane (TMS). Multiplicities are abbreviated as s=singlet, d=doublet, q=quartet, t=triplet and m=multiplet.
